# Supplementary material for: Efficient, solvent-free hydrogenation of α-angelica lactone catalysed by Ru/C at atmospheric pressure and room temperature
Source: Royal Society of Chemistry journal article supplement (doi:10.1039/c4cc03970j), 2014-07-16
Supplement: c4cc03970j1.pdf [file c4cc03970j1.pdf]

## ***Experimental***

### ***General remarks***

$\alpha$ -angelica lactone (98%),  $\gamma$ -valerolactone (99%), 2-pentenoic acid (98%), 3-pentenoic acid ( $\geq 95\%$ ), 4-pentenoic acid ( $\geq 98\%$ ), 2 4-pentadienoic acid ( $\geq 97\%$ ), 1-hexanol (99.5%), levulinic acid ( $\geq 98\%$ ), 2-methyltetrahydrofuran (99.5 %), 1,4-pentanediol (99%), 1-pentanol ( $\geq 99\%$ ), 2-pentanol ( $\geq 98\%$ ) and ruthenium (5 wt%) supported on carbon (Batch Nr°: MKBN8598V) were purchased from Sigma-Aldrich. Methanol (99.8%) and ethanol (99.9%) were purchased from Chemsolute.  $\gamma$ -Methylene- $\gamma$ -butyrolactone ( $>98\%$ ) was purchased from TCI and valeric acid (99%) from Alfa Aesar. All chemicals were used without further purification or drying. GC analysis was performed on an Agilent HP6890.

### ***General Procedure at high Pressure***

A 50 mL Hastelloy high pressure autoclave (Schlesinger B18rb250-01) was charged with  $\alpha$ -Angelica lactone (1.689 g, 17.22 mmol), Ru/C (5 wt%, 100 mg, 49  $\mu$ mol Ru) and a magnetic stirring bar. The autoclave was flushed four times before applying the desired pressure and where necessary, heated using an aluminum block. A stirring speed of 500 RPM was used. After the reaction period, the autoclave was cooled down and depressurized. The reaction mixture was filtered using micro filters (Chromafil 45/25) and the liquid sample was diluted with ethanol and analyzed by GC (1-hexanol was used as internal standard).

### ***General Procedure at Atmospheric Pressure***

A 50 mL two-neck tubular glass reactor, fitted with a condenser was charged with  $\alpha$ -angelica lactone (8.445 g, 86.10 mmol) and Ru/C (5 wt%, 500 mg, 0.245 mmol Ru). H<sub>2</sub> was sparged through the solution using a gas frit. The H<sub>2</sub> flow (130 mL/min or 500 mL/min) was calibrated with a digital flow meter. The reactor was heated using an oil bath and no additional agitation was provided. The exhaust gas was passed through a liquid N<sub>2</sub>-cooled cold trap. Samples of the reaction mixture ( $\approx 75$  mg) were collected by syringe and

centrifuged. The resulting clear samples were diluted with ethanol and analyzed by GC (1-hexanol was used as internal standard).

## Sample Analysis

The identity of reaction products (e.g.  $\beta$ -angelica lactone, valeric acid,  $\gamma$ -methylene- $\gamma$ -butyrolactone, 2,4-pentadienoic acid, pentenoic acid isomers and levulinic acid) was confirmed by GC-MS analysis and comparison with authentic samples. Quantitative analysis of samples of  $\alpha$ -angelica lactone hydrogenation reactions was performed by GC-FID using a CP-Wax-52 column (60 m  $\times$  250  $\mu$ m  $\times$  0.25  $\mu$ m). Quantitative analysis of samples of 2-MTHF synthesis reactions was performed by GC-FID using a CP-Sil-Pona-CB column (50 m  $\times$  210  $\mu$ m  $\times$  0.5  $\mu$ m). Qualitative analysis was performed by GC-MS on a Trace GC chromatograph 1310 equipped with a Restek Rxi-1 MS column (60 m  $\times$  250  $\mu$ m  $\times$  0.5  $\mu$ m) and a Thermo Scientific ISQ mass spectrometer (EI+, 70 eV, 250  $^{\circ}$ C).

## Isomerization of $\alpha$ -Angelica lactone

### Experimental data

| t (min) | $\alpha$ -AL | $\beta$ -AL | $\gamma$ -MBL |
|---------|--------------|-------------|---------------|
| 0       | 98,33%       | 0,51%       | 0,87%         |
| 15      | 94,6%        | 1,9%        | 3,5%          |
| 30      | 94,3%        | 2,4%        | 3,3%          |
| 45      | 92,2%        | 4,1%        | 3,7%          |
| 60      | 91,1%        | 5,1%        | 3,8%          |
| 75      | 89,7%        | 6,3%        | 4,0%          |
| 90      | 88,7%        | 7,3%        | 4,0%          |
| 180     | 85,1%        | 11,0%       | 4,0%          |
| 270     | 77,7%        | 17,5%       | 4,8%          |
| 360     | 80,5%        | 15,6%       | 3,9%          |

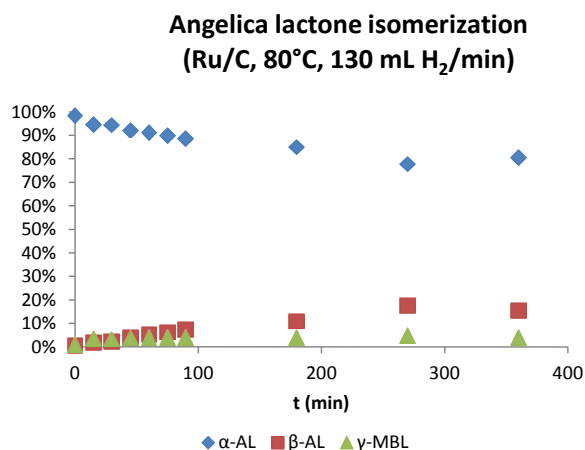

**Figure 1** Relative lactone composition. (Conditions:  $\alpha$ -AL (1.68 g, 17.13mmol), Ru/C (5 wt% Ru, 100 mg, 49  $\mu$ mol Ru), 80  $^{\circ}$ C, 1 atm, 130 mL H<sub>2</sub>/min)

## DFT Calculations

The computations in this work were carried out with the Gaussian09 program series (Revision D.01).<sup>1</sup> Geometry optimizations in ethylacetate phase were carried using the MN12-L12 density functional and the def2-TZVP basis set.<sup>2</sup> The automatic density fitting approximation was activated.<sup>3</sup> Solvent effects (ethylacetate) were considered implicitly by applying the IEF-PCM<sup>4</sup> formalism and the SMD radii model.<sup>5</sup> The structures were characterized by frequency calculations to be local minima ( $i = 0$ ). Thermochemical corrections were computed for a temperature of 298.15 K. A pressure of 251 atm was specified to account for entropy corrections in the condensed phase as was described elsewhere.<sup>6</sup> The obtained energies and predicted equilibrium composition are listed in the tables below.

| MN-12-L/def2-TZVP (Ethylacetat, 298.15 °K) |              |             |             |             |
|--------------------------------------------|--------------|-------------|-------------|-------------|
| Compound                                   | E            | $E_{zpe}$   | H           | G           |
| $\alpha$ -angelica lactone                 | -344.4090044 | -344.306171 | -344.299094 | -344.330793 |
| $\beta$ -angelica lactone                  | -344.4090458 | -344.305299 | -344.298395 | -344.329841 |
| $\gamma$ -methylenebutyrolactone           | -344.403877  | -344.300567 | -344.293615 | -344.325429 |

| Boltzmann distribution           |                       |                    |                      |
|----------------------------------|-----------------------|--------------------|----------------------|
| Compound                         | $E_{rel}$<br>(KJ/mol) | $EXP(-E_{rel}/RT)$ | $N_i/N_{tot}$<br>(%) |
| $\alpha$ -angelica lactone       | 0                     | 1                  | 73.09%               |
| $\beta$ -angelica lactone        | 2.499476              | 0.364827           | 26.66%               |
| $\gamma$ -methylenebutyrolactone | 14.08318              | 0.003409           | 0.25%                |

## References

- 1 Gaussian 09, Revision D.01, M. J. Frisch, G. W. Trucks, H. B. Schlegel, G. E. Scuseria, M. A. Robb, J. R. Cheeseman, G. Scalmani, V. Barone, B. Mennucci, G. A. Petersson, H. Nakatsuji, M. Caricato, X. Li, H. P. Hratchian, A. F. Izmaylov, J. Bloino, G. Zheng, J. L. Sonnenberg, M. Hada, M. Ehara, K. Toyota, R. Fukuda, J. Hasegawa, M. Ishida, T. Nakajima, Y. Honda, O. Kitao, H. Nakai, T. Vreven, J. A. Montgomery, Jr., J. E. Peralta, F. Ogliaro, M. Bearpark, J. J. Heyd, E. Brothers, K. N. Kudin, V. N. Staroverov, T.

Keith, R. Kobayashi, J. Normand, K. Raghavachari, A. Rendell, J. C. Burant, S. S. Iyengar, J. Tomasi, M. Cossi, N. Rega, J. M. Millam, M. Klene, J. E. Knox, J. B. Cross, V. Bakken, C. Adamo, J. Jaramillo, R. Gomperts, R. E. Stratmann, O. Yazyev, A. J. Austin, R. Cammi, C. Pomelli, J. W. Ochterski, R. L. Martin, K. Morokuma, V. G. Zakrzewski, G. A. Voth, P. Salvador, J. J. Dannenberg, S. Dapprich, A. D. Daniels, O. Farkas, J. B. Foresman, J. V. Ortiz, J. Cioslowski, and D. J. Fox, Gaussian, Inc., Wallingford CT, 2010

2 a) A. Schäfer, H. Horn, R. Ahlrichs, *J. Chem. Phys.* 1992, **97**, 2571; b) A. Schäfer, C. Huber, R. Ahlrichs, *J. Chem. Phys.* 1994, **100**, 5829; c) K. Eichkorn, F. Weigend, O. Treutler, R. Ahlrichs, *Theor. Chem. Acc.* 1997, **97**, 119–124; d) F. Weigend, F. Furche, R. Ahlrichs, *J. Chem. Phys.* 2003, **119**, 12753; e) F. Weigend, R. Ahlrichs, *Phys. Chem. Chem. Phys.* 2005, **7**, 3297–3305.

3 a) B. I. Dunlap, *J. Chem. Phys.* 1983, **78**, 3140; b) B. Dunlap, *J. Mol. Struct.* 2000, **529**, 37–40.

4 a) J. Tomasi, B. Mennucci, R. Cammi, *Chem. Rev.* 2005, **105**, 2999–3093; b) E. Cancès, B. Mennucci, J. Tomasi, *J. Chem. Phys.* 1997, **107**, 3032

5 A. V. Marenich, C. J Cramer, D. G. Truhlar, *J. Phys. Chem. B.* 2009, **113**, 6378-6396.

6 a) R. L. Martin, P. J. Hay, L. R. Pratt, *J. Phys. Chem. A* 1998, **102**, 3565–3573; b) N. Sieffert, M. Bühl, *Inorg. Chem.* 2009, **48**, 4622 – 4624
